# Supplementary material for: Trends and Disparities in Chronic Kidney Disease and Hypertension-Related Mortality in the United States, 2000–2023
Source: Research Square preprint supplement (doi:10.21203/rs.3.rs-8880840/v1), 2026-02-21
Supplement: Supplementary file 2 [file 636d8a2e335379f87d8c6c9b.docx]

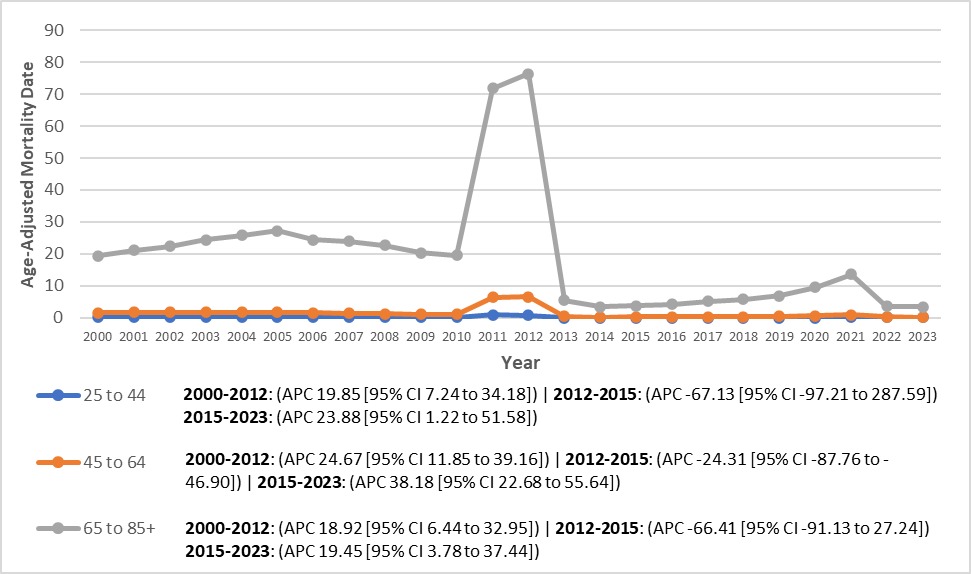


**Supplementary Figure 1.** Trends in CKD-related mortality in patients with HTN AAMR per 100,000 stratified by age group in the United States from 2000 to 2023.


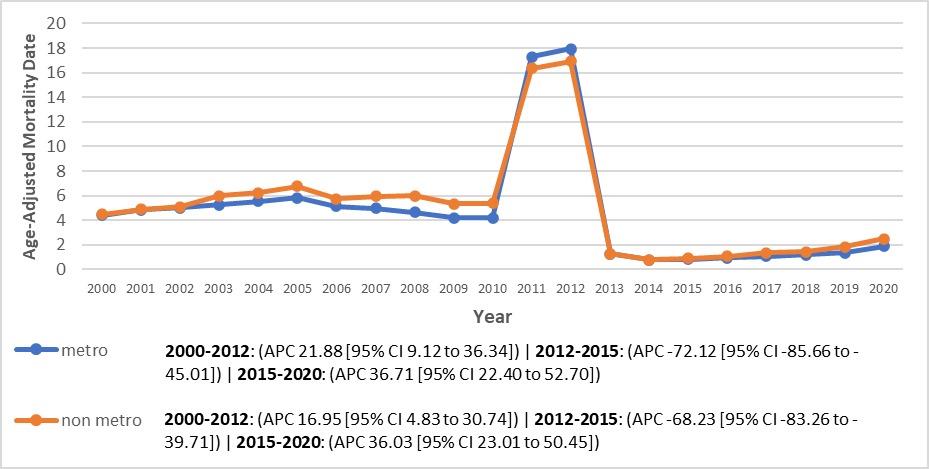


**Supplementary Figure 2.** Trends in CKD-related mortality in patients with HTN AAMR per 100,000 stratified by Urbanization in the United States from 2000 to 2020.

|  | **Overall** | **Female** | **Male** | **Hispanic or Latino** | **NH American Indian** | **NH Asian** | **NH Black** | **NH White** |
| --- | --- | --- | --- | --- | --- | --- | --- | --- |
| **2000** | 7,928 | 4,268 | 3,660 | 494 | 42 | 209 | 1837 | 5,330 |
| **2001** | 8,692 | 4,650 | 4,042 | 547 | 41 | 246 | 1,888 | 5,945 |
| **2002** | 9,322 | 5,019 | 4,303 | 586 | 51 | 255 | 2,112 | 6,299 |
| **2003** | 10,209 | 5,378 | 4,831 | 621 | 61 | 288 | 2,153 | 7,055 |
| **2004** | 10,854 | 5,744 | 5,110 | 677 | 56 | 287 | 2,265 | 7,545 |
| **2005** | 11,626 | 6,131 | 5,495 | 800 | 76 | 305 | 2,368 | 8,052 |
| **2006** | 10,617 | 5,556 | 5,061 | 701 | 60 | 273 | 1,961 | 7,605 |
| **2007** | 10,537 | 5,550 | 4,987 | 623 | 63 | 302 | 1,953 | 7,576 |
| **2008** | 10,155 | 5,239 | 4,916 | 681 | 51 | 316 | 1,712 | 7,381 |
| **2009** | 9,375 | 4,885 | 4,490 | 624 | 50 | 279 | 1,594 | 6,814 |
| **2010** | 9,117 | 4,719 | 4,398 | 615 | 47 | 279 | 1,496 | 6,664 |
| **2011** | 36,660 | 18,912 | 17,748 | 3,364 | 250 | 1,397 | 7,782 | 23,794 |
| **2012** | 39,727 | 20,438 | 19,289 | 3,736 | 304 | 1,450 | 8,190 | 25,930 |
| **2013** | 2,873 | 1,460 | 1,413 | 286 | 23 | 116 | 596 | 1,848 |
| **2014** | 1,839 | 949 | 890 | 152 | 15 | 59 | 361 | 1,245 |
| **2015** | 2,071 | 1,029 | 1,042 | 190 | 18 | 54 | 382 | 1,422 |
| **2016** | 2,392 | 1,206 | 1,186 | 233 | 22 | 73 | 428 | 1,631 |
| **2017** | 2,975 | 1,475 | 1,500 | 286 | 26 | 94 | 542 | 2,016 |
| **2018** | 3,301 | 1,680 | 1,621 | 324 | 24 | 106 | 543 | 2,295 |
| **2019** | 3,993 | 2,029 | 1,964 | 330 | 25 | 100 | 707 | 2,820 |
| **2020** | 5,716 | 2,823 | 2,893 | 538 | 44 | 175 | 991 | 3,954 |
| **2021** | 7,897 | 3,916 | 3,981 | 787 | 79 | 228 | 1,368 | 5,369 |
| **2022** | 2,175 | 1,082 | 1,093 | 191 | 15 | 71 | 391 | 1,488 |
| **2023** | 2,085 | 1,089 | 996 | 187 |  | 77 | 435 | 1,366 |
| **Total** | 222,136 | 115,227 | 106,909 | 17,573 | 1,443 | 7,039 | 44,055 | 151,444 |

**Supplementary Table 1.** Overall and sex stratified CKD and HTN-related deaths in the United States from 2000 to 2023.

| **Year** | **Medical Facility** | **Nursing Home/Long Term Care** | **Hospices** | **Home** | **Other** |
| --- | --- | --- | --- | --- | --- |
| 2000 | 4195 | 2151 | 0 | 1416 | 163 |
| 2001 | 4505 | 2342 | 0 | 1564 | 231 |
| 2002 | 4674 | 2600 | 0 | 1777 | 271 |
| 2003 | 4880 | 2977 | 15 | 1990 | 321 |
| 2004 | 5048 | 3128 | 28 | 2210 | 401 |
| 2005 | 5277 | 3360 | 115 | 2427 | 423 |
| 2006 | 4639 | 3157 | 155 | 2243 | 380 |
| 2007 | 4262 | 3289 | 290 | 2280 | 394 |
| 2008 | 4030 | 3064 | 242 | 2290 | 420 |
| 2009 | 3607 | 2761 | 310 | 2161 | 363 |
| 2010 | 3458 | 2725 | 338 | 2266 | 326 |
| 2011 | 14627 | 9652 | 1670 | 9180 | 1505 |
| 2012 | 15074 | 10421 | 2084 | 10386 | 1751 |
| 2013 | 1299 | 692 | 161 | 747 | 122 |
| 2014 | 734 | 476 | 113 | 554 | 56 |
| 2015 | 883 | 524 | 164 | 586 | 68 |
| 2016 | 930 | 572 | 177 | 744 | 95 |
| 2017 | 1026 | 730 | 294 | 927 | 122 |
| 2018 | 1081 | 843 | 288 | 1091 | 126 |
| 2019 | 1234 | 977 | 341 | 1435 | 167 |
| 2020 | 1781 | 1277 | 359 | 2253 | 293 |
| 2021 | 2776 | 1482 | 528 | 2774 | 336 |
| 2022 | 776 | 391 | 168 | 837 | 89 |
| 2023 | 684 | 416 | 178 | 792 | 89 |
| Total | 85975 | 57718 | 7144 | 50527 | 7998 |

**Supplementary Table 2.** CKD and HTN-related deaths stratified by place of death in the United States from 2000 to 2023

| **Crude Rate (95% CI)** |
| --- |

| Year | 25-44 years | 45-64 years | 65-85+ years |
| --- | --- | --- | --- |
| 2000 | 0.20 (0.17-0.22) | 1.59 (1.49-1.69) | 19.36 (18.90-19.82) |
| 2001 | 0.20 (0.17-0.23) | 1.67 (1.57-1.77) | 21.10 (20.63-21.58) |
| 2002 | 0.23 (0.19-0.26) | 1.70 (1.60-1.80) | 22.51 (22.02-23.00) |
| 2003 | 0.20 (0.17-0.23) | 1.74 (1.64-1.84) | 24.66 (24.15-25.18) |
| 2004 | 0.19 (0.16-0.22) | 1.77 (1.67-1.87) | 26.07 (25.55-26.60) |
| 2005 | 0.18 (0.16-0.21) | 1.83 (1.73-1.93) | 27.65 (27.11-28.19) |
| 2006 | 0.18 (0.15-0.21) | 1.54 (1.45-1.63) | 25.05 (24.54-25.56) |
| 2007 | 0.15 (0.12-0.17) | 1.45 (1.37-1.54) | 24.58 (24.08-25.08) |
| 2008 | 0.15 (0.13-0.18) | 1.32 (1.24-1.40) | 23.19 (22.71-23.67) |
| 2009 | 0.15 (0.12-0.18) | 1.23 (1.15-1.31) | 20.86 (20.41-21.31) |
| 2010 | 0.11 (0.09-0.13) | 1.19 (1.11-1.26) | 20.02 (19.58-20.45) |
| 2011 | 0.83 (0.77-0.90) | 6.87 (6.69-7.05) | 73.16 (72.34-73.99) |
| 2012 | 0.79 (0.73-0.85) | 7.07 (6.89-7.25) | 76.98 (76.16-77.81) |
| 2013 | 0.07 (0.05-0.09) | 0.50 (0.45-0.55) | 5.37 (5.15-5.58) |
| 2014 | 0.04 (0.03-0.05) | 0.28 (0.24-0.31) | 3.41 (3.24-3.58) |
| 2015 | 0.05 (0.04-0.07) | 0.29 (0.25-0.33) | 3.73 (3.56-3.90) |
| 2016 | 0.05 (0.03-0.06) | 0.37 (0.33-0.41) | 4.14 (3.96-4.32) |
| 2017 | 0.04 (0.03-0.06) | 0.41 (0.37-0.46) | 5.09 (4.89-5.28) |
| 2018 | 0.06 (0.04-0.07) | 0.42 (0.38-0.47) | 5.52 (5.32-5.72) |
| 2019 | 0.05 (0.04-0.07) | 0.47 (0.42-0.51) | 6.58 (6.36-6.80) |
| 2020 | 0.07 (0.06-0.10) | 0.71 (0.65-0.77) | 9.10 (8.85-9.35) |
| 2021 | 0.10 (0.10-0.20) | 1.10 (1.10-1.20) | 12.20 (11.90-12.50) |
| 2022 | 0 (0-0.10) | 0.30 (0.30-0.30) | 3.30 (3.10-3.40) |
| 2023 | 0 (0-0) | 0.30 (0.20-0.30) | 3.10 (3.00-3.30) |
| Total | 0.17 (0.15–0.20) | 1.51 (1.43–1.58) | 19.45 (19.06–19.83) |

**Supplementary Table 3.** CKD and HTN-related mortality Crude Rate per 100,000 stratified by Age Group in the United States from 2000 to 2023.

| **Age-Adjusted Rate (95% CI)** | | | |
| --- | --- | --- | --- |
| **Year** | **Overall** | **Female** | **Male** |
| **2000** | 4.45 (4.35-4.54) | 3.91 (3.80-4.03) | 5.32 (5.15-5.50) |
| **2001** | 4.80 (4.70-4.90) | 4.18 (4.06-4.31) | 5.76 (5.57-5.94) |
| **2002** | 5.05 (4.95-5.15) | 4.47 (4.34-4.59) | 6.05 (5.86-6.23) |
| **2003** | 5.47 (5.37-5.58) | 4.70 (4.57-4.82) | 6.72 (6.53-6.91) |
| **2004** | 5.71 (5.60-5.82) | 4.95 (4.82-5.08) | 6.97 (6.78-7.17) |
| **2005** | 6.01 (5.90-6.12) | 5.16 (5.03-5.29) | 7.35 (7.15-7.55) |
| **2006** | 5.40 (5.30-5.51) | 4.62 (4.50-4.74) | 6.60 (6.42-6.79) |
| **2007** | 5.23 (5.13-5.33) | 4.47 (4.35-4.59) | 6.41 (6.23-6.59) |
| **2008** | 4.94 (4.85-5.04) | 4.14 (4.03-4.25) | 6.11 (5.94-6.28) |
| **2009** | 4.46 (4.37-4.55) | 3.81 (3.70-3.92) | 5.47 (5.30-5.63) |
| **2010** | 4.27 (4.18-4.36) | 3.60 (3.49-3.70) | 5.23 (5.08-5.39) |
| **2011** | 16.66 (16.49-16.83) | 14.44 (14.23-14.65) | 19.80 (19.50-20.09) |
| **2012** | 17.58 (17.41-17.76) | 15.17 (14.96-15.38) | 20.95 (20.65-21.25) |
| **2013** | 1.26 (1.21-1.30) | 1.08 (1.02-1.14) | 1.48 (1.40-1.56) |
| **2014** | 0.77 (0.73-0.80) | 0.67 (0.63-0.71) | 0.92 (0.85-0.98) |
| **2015** | 0.85 (0.82-0.89) | 0.72 (0.67-0.76) | 1.04 (0.98-1.10) |
| **2016** | 0.99 (0.95-1.03) | 0.84 (0.79-0.89) | 1.16 (1.09-1.23) |
| **2017** | 1.17 (1.13-1.21) | 1.01 (0.95-1.06) | 1.44 (1.37-1.52) |
| **2018** | 1.27 (1.23-1.31) | 1.10 (1.05-1.16) | 1.50 (1.42-1.57) |
| **2019** | 1.52 (1.48-1.57) | 1.31 (1.25-1.37) | 1.78 (1.70-1.86) |
| **2020** | 2.12 (2.07-2.18) | 1.79 (1.72-1.85) | 2.58 (2.49-2.68) |
| **2021** | 3.10 (3.00-3.10) | 2.70 (2.60-2.70) | 3.60 (3.50-3.80) |
| **2022** | 0.80 (0.80-0.90) | 0.70 (0.60-0.70) | 1.00 (0.90-1.00) |
| **2023** | 0.80 (0.70-0.80) | 0.70 (0.60-0.70) | 0.90 (0.80-0.90) |
| **Total** | 4.36 (4.28–4.44) | 3.76 (3.66–3.85) | 5.26 (5.11–5.40) |

**Supplementary Table 4.** Overall and sex-stratified CKD and HTN-related AAMR per 100,000 in the United States from 2000 to 2023.

|  | **Age-Adjusted Rate (95% CI)** | | | | |
| --- | --- | --- | --- | --- | --- |
| **Year** | **Hispanic** | **NH American Indian** | **NH Asian** | **NH Black** | **NH White** |
| **2000** | 5.64 (5.12-6.16) | 5.92 (4.19-8.12) | 5.32 (4.57-6.07) | 12.35 (11.78-12.92) | 3.52 (3.43-3.61) |
| **2001** | 5.96 (5.44-6.48) | 5.34 (3.78-7.33) | 5.55 (4.83-6.27) | 12.48 (11.91-13.05) | 3.92 (3.82-4.02) |
| **2002** | 6.11 (5.59-6.62) | 6.28 (4.56-8.43) | 5.64 (4.93-6.36) | 13.80 (13.21-14.40) | 4.09 (3.99-4.19) |
| **2003** | 6.09 (5.60-6.59) | 6.76 (5.07-8.85) | 6.05 (5.33-6.77) | 13.77 (13.17-14.36) | 4.48 (4.38-4.59) |
| **2004** | 6.40 (5.90-6.91) | 7.12 (5.30-9.36) | 5.83 (5.13-6.52) | 14.37 (13.76-14.97) | 4.76 (4.65-4.87) |
| **2005** | 7.06 (6.55-7.57) | 9.39 (7.31-11.89) | 5.77 (5.11-6.44) | 14.68 (14.08-15.29) | 4.96 (4.85-5.07) |
| **2006** | 6.01 (5.55-6.47) | 7.16 (5.35-9.40) | 4.78 (4.20-5.36) | 11.90 (11.36-12.43) | 4.64 (4.53-4.74) |
| **2007** | 5.15 (4.73-5.57) | 6.77 (5.10-8.82) | 5.04 (4.45-5.62) | 11.59 (11.06-12.12) | 4.50 (4.40-4.60) |
| **2008** | 5.27 (4.86-5.68) | 5.54 (4.04-7.42) | 5.06 (4.49-5.63) | 9.98 (9.50-10.46) | 4.32 (4.22-4.42) |
| **2009** | 4.54 (4.17-4.91) | 5.00 (3.63-6.71) | 4.22 (3.71-4.72) | 8.93 (8.48-9.38) | 3.94 (3.85-4.03) |
| **2010** | 4.32 (3.96-4.67) | 4.45 (3.19-6.04) | 4.10 (3.61-4.59) | 8.27 (7.84-8.69) | 3.80 (3.71-3.89) |
| **2011** | 20.95 (20.22-21.68) | 22.05 (19.14-24.96) | 18.05 (17.08-19.01) | 39.38 (38.48-40.28) | 13.32 (13.15-13.49) |
| **2012** | 22.07 (21.34-22.81) | 25.73 (22.66-28.80) | 17.40 (16.48-18.31) | 40.32 (39.42-41.22) | 14.24 (14.06-14.41) |
| **2013** | 1.63 (1.44-1.83) | 1.99 (1.23-3.05) | 1.28 (1.04-1.52) | 2.85 (2.62-3.09) | 1.00 (0.95-1.05) |
| **2014** | 0.81 (0.68-0.94) | Unreliable | 0.62 (0.47-0.81) | 1.69 (1.51-1.87) | 0.67 (0.63-0.70) |
| **2015** | 0.95 (0.81-1.10) | Unreliable | 0.55 (0.41-0.72) | 1.72 (1.55-1.90) | 0.73 (0.69-0.77) |
| **2016** | 1.12 (0.98-1.27) | 1.52 (0.93-2.35) | 0.68 (0.53-0.86) | 1.85 (1.67-2.04) | 0.84 (0.80-0.88) |
| **2017** | 1.29 (1.14-1.44) | 1.87 (1.20-2.78) | 0.83 (0.67-1.02) | 2.27 (2.07-2.46) | 1.00 (0.95-1.04) |
| **2018** | 1.41 (1.25-1.57) | 1.60 (1.00-2.43) | 0.87 (0.71-1.04) | 2.26 (2.06-2.45) | 1.14 (1.09-1.19) |
| **2019** | 1.43 (1.27-1.58) | 1.75 (1.12-2.61) | 0.79 (0.64-0.95) | 2.87 (2.65-3.09) | 1.37 (1.32-1.42) |
| **2020** | 2.19 (2.00-2.38) | 2.68 (1.93-3.63) | 1.30 (1.11-1.50) | 3.95 (3.70-4.20) | 1.92 (1.85-1.98) |
| **2021** | 3.10 (2.90-3.40) | 5.00 (3.90-6.20) | 1.80 (1.60-2.00) | 5.50 (5.20-5.80) | 2.80 (2.70-2.80) |
| **2022** | 0.70 (0.60-0.80) | Unreliable | 0.50 (0.40-0.60) | 1.50 (1.40-1.70) | 0.70 (0.70-0.80) |
| **2023** | 0.70 (0.60-0.80) |  | 0.50 (0.40-0.70) | 1.70 (1.50-1.90) | 0.70 (0.60-0.70) |
| **Total** | 5.04 (4.70–5.38) | 6.70 (5.23–8.46) | 4.27 (3.83–4.72) | 10.00 (9.58–10.42) | 3.64 (3.56–3.72) |

**Supplementary Table 5.** CKD and HTN-related AAMR per 100,000 stratified by race in the United States from 2000 to 2023.

| **Age-Adjusted Rate (95% CI)** | | |
| --- | --- | --- |
| **Year** | **Metropolitan** | **Nonmetropolitan** |
| **2000** | 4.41 (4.30–4.52) | 4.43 (4.19–4.67) |
| **2001** | 4.77 (4.65–4.88) | 4.82 (4.58–5.07) |
| **2002** | 5.03 (4.92–5.15) | 5.05 (4.81–5.29) |
| **2003** | 5.39 (5.28–5.51) | 5.95 (5.70–6.20) |
| **2004** | 5.66 (5.55–5.78) | 6.24 (5.98–6.49) |
| **2005** | 5.88 (5.76–5.99) | 6.72 (6.46–6.97) |
| **2006** | 5.34 (5.22–5.46) | 5.71 (5.46–5.95) |
| **2007** | 5.15 (5.04–5.26) | 5.96 (5.71–6.21) |
| **2008** | 4.81 (4.70–4.92) | 5.98 (5.74–6.23) |
| **2009** | 4.37 (4.27–4.47) | 5.35 (5.11–5.58) |
| **2010** | 4.14 (4.04–4.24) | 5.39 (5.16–5.63) |
| **2011** | 16.65 (16.48–16.82) | 16.24 (15.82–16.66) |
| **2012** | 17.66 (17.49–17.83) | 16.86 (16.44–17.27) |
| **2013** | 1.25 (1.20–1.30) | 1.26 (1.14–1.37) |
| **2014** | 0.77 (0.73–0.81) | 0.80 (0.71–0.89) |
| **2015** | 0.85 (0.81–0.89) | 0.93 (0.84–1.03) |
| **2016** | 0.97 (0.92–1.01) | 1.07 (0.97–1.17) |
| **2017** | 1.15 (1.10–1.19) | 1.35 (1.24–1.46) |
| **2018** | 1.27 (1.22–1.32) | 1.46 (1.34–1.57) |
| **2019** | 1.48 (1.43–1.53) | 1.86 (1.73–1.99) |
| **2020** | 2.11 (2.05–2.17) | 2.47 (2.32–2.62) |

**Supplementary Table 6.** CKD and HTN-Related AAMR per 100,000 stratified by urban-rural classification in the United States from 2000 to 2020.

| **State** | **Age-Adjusted Rate (95% CI)** |
| --- | --- |
| **Alabama** | 4 (3.9-4.1) |
| **Alaska** | 4.2 (3.6-4.7) |
| **Arizona** | 3.2 (3.1-3.4) |
| **Arkansas** | 3.2 (3-3.4) |
| **California** | 6.1 (6.1-6.2) |
| **Colorado** | 3.5 (3.3-3.6) |
| **Connecticut** | 2.4 (2.3-2.5) |
| **Delaware** | 4.2 (3.9-4.5) |
| **District of** **Columbia** | 7.4 (6.8-8.0) |
| **Florida** | 3 (2.9-3.0) |
| **Georgia** | 3.6 (3.5-3.7) |
| **Hawaii** | 4.7 (4.5-5.0) |
| **Idaho** | 3.5 (3.2-3.7) |
| **Illinois** | 3.8 (3.8-3.9) |
| **Indiana** | 4.9 (4.8-5.1) |
| **Iowa** | 4.4 (4.2-4.6) |
| **Kansas** | 2.9 (2.8-3.1) |
| **Kentucky** | 4.4 (4.3-4.6) |
| **Louisiana** | 3.4 (3.3-3.5) |
| **Maine** | 3.6 (3.4-3.9) |
| **Maryland** | 5.5 (5.4-5.7) |
| **Massachusetts** | 2.6 (2.5-2.7) |
| **Michigan** | 4.2 (4.1-4.3) |
| **Minnesota** | 5.7 (5.5-5.8) |
| **Mississippi** | 4.6 (4.4-4.8) |
| **Missouri** | 4.2 (4.1-4.4) |
| **Montana** | 2.7 (2.5-3.0) |
| **Nebraska** | 5 (4.7-5.2) |
| **Nevada** | 1.9 (1.7-2.0) |
| **New Hampshire** | 3.7 (3.4-3.9) |
| **New Jersey** | 3.3 (3.2-3.4) |
| **New Mexico** | 3.2 (3.0-3.4) |
| **New York** | 3.5 (3.4-3.5) |
| **North Carolina** | 5.4 (5.3-5.6) |
| **North Dakota** | 8.1 (7.6-8.6) |
| **Ohio** | 6.9 (6.8-7.0) |
| **Oklahoma** | 6.3 (6.1-6.6) |
| **Oregon** | 4.5 (4.3-4.7) |
| **Pennsylvania** | 3.8 (3.7-3.9) |
| **Rhode Island** | 4.7 (4.4-5.0) |
| **South Carolina** | 5.9 (5.7-6.1) |
| **South Dakota** | 4.9 (4.6-5.3) |
| **Tennessee** | 6.2 (6.0-6.3) |
| **Texas** | 5.6 (5.5-5.7) |
| **Utah** | 2 (1.8-2.2) |
| **Vermont** | 5.6 (5.1-6.0) |
| **Virginia** | 3.5 (3.4-3.6) |
| **Washington** | 5.4 (5.2-5.5) |
| **West Virginia** | 6.7 (6.4-7.0) |
| **Wisconsin** | 4 (3.9-4.1) |
| **Wyoming** | 2.6 (2.2-2.9) |

**Supplementary Table 7.** CKD and HTN-Related AAMR per 100,000 stratified by state in the United States from 2000 to 2020.

| **Census Region** | **Year** | **Age-Adjusted Rate (95%CI)** |
| --- | --- | --- |
| Census Region 1: Northeast | 2000 | 3.51 (3.32-3.7) |
| Census Region 1: Northeast | 2001 | 3.82 (3.62-4.02) |
| Census Region 1: Northeast | 2002 | 3.98 (3.78-4.18) |
| Census Region 1: Northeast | 2003 | 4.06 (3.86-4.26) |
| Census Region 1: Northeast | 2004 | 4.36 (4.15-4.57) |
| Census Region 1: Northeast | 2005 | 4.36 (4.16-4.57) |
| Census Region 1: Northeast | 2006 | 3.94 (3.75-4.14) |
| Census Region 1: Northeast | 2007 | 3.9 (3.71-4.09) |
| Census Region 1: Northeast | 2008 | 3.56 (3.38-3.74) |
| Census Region 1: Northeast | 2009 | 3.26 (3.08-3.43) |
| Census Region 1: Northeast | 2010 | 3.17 (3.0-3.33) |
| Census Region 1: Northeast | 2011 | 12.71 (12.37-13.04) |
| Census Region 1: Northeast | 2012 | 13.33 (12.99-13.67) |
| Census Region 1: Northeast | 2013 | 1.09 (0.99-1.19) |
| Census Region 1: Northeast | 2014 | 0.59 (0.52-0.66) |
| Census Region 1: Northeast | 2015 | 0.65 (0.58-0.73) |
| Census Region 1: Northeast | 2016 | 0.75 (0.67-0.83) |
| Census Region 1: Northeast | 2017 | 0.89 (0.81-0.98) |
| Census Region 1: Northeast | 2018 | 0.93 (0.84-1.01) |
| Census Region 1: Northeast | 2019 | 1.06 (0.97-1.16) |
| Census Region 1: Northeast | 2020 | 1.39 (1.28-1.49) |
| Census Region 1: Northeast | 2021 | 1.9 (1.7-2.0) |
| Census Region 1: Northeast | 2022 | 0.6 (0.5-0.7) |
| Census Region 1: Northeast | 2023 | 0.6 (0.6-0.7) |
| **Total** |  | 3.27 (3.11–3.42) |
| Census Region 2: Midwest | 2000 | 4.78 (4.57-4.98) |
| Census Region 2: Midwest | 2001 | 5.13 (4.92-5.34) |
| Census Region 2: Midwest | 2002 | 5.35 (5.13-5.57) |
| Census Region 2: Midwest | 2003 | 5.82 (5.6-6.05) |
| Census Region 2: Midwest | 2004 | 6.42 (6.19-6.66) |
| Census Region 2: Midwest | 2005 | 6.62 (6.38-6.85) |
| Census Region 2: Midwest | 2006 | 5.93 (5.71-6.16) |
| Census Region 2: Midwest | 2007 | 6.04 (5.82-6.26) |
| Census Region 2: Midwest | 2008 | 5.71 (5.5-5.93) |
| Census Region 2: Midwest | 2009 | 5.23 (5.03-5.44) |
| Census Region 2: Midwest | 2010 | 4.69 (4.5-4.88) |
| Census Region 2: Midwest | 2011 | 16.79 (16.43-17.15) |
| Census Region 2: Midwest | 2012 | 17.42 (17.06-17.79) |
| Census Region 2: Midwest | 2013 | 1.21 (1.11-1.3) |
| Census Region 2: Midwest | 2014 | 0.76 (0.69-0.84) |
| Census Region 2: Midwest | 2015 | 0.91 (0.83-0.99) |
| Census Region 2: Midwest | 2016 | 1.03 (0.94-1.12) |
| Census Region 2: Midwest | 2017 | 1.28 (1.18-1.38) |
| Census Region 2: Midwest | 2018 | 1.32 (1.22-1.42) |
| Census Region 2: Midwest | 2019 | 1.66 (1.56-1.77) |
| Census Region 2: Midwest | 2020 | 2.48 (2.35-2.61) |
| Census Region 2: Midwest | 2021 | 3.3 (3.1-3.4) |
| Census Region 2: Midwest | 2022 | 0.9 (0.8-0.9) |
| Census Region 2: Midwest | 2023 | 0.7 (0.7-0.8) |
| **Total** |  | 4.65 (4.47–4.82) |
| Census Region 3: South | 2000 | 4.73 (4.56-4.91) |
| Census Region 3: South | 2001 | 4.99 (4.82-5.16) |
| Census Region 3: South | 2002 | 5.3 (5.12-5.47) |
| Census Region 3: South | 2003 | 5.79 (5.6-5.98) |
| Census Region 3: South | 2004 | 5.79 (5.6-5.97) |
| Census Region 3: South | 2005 | 6.33 (6.14-6.52) |
| Census Region 3: South | 2006 | 5.5 (5.32-5.67) |
| Census Region 3: South | 2007 | 5.16 (4.99-5.33) |
| Census Region 3: South | 2008 | 4.76 (4.6-4.92) |
| Census Region 3: South | 2009 | 4.44 (4.29-4.6) |
| Census Region 3: South | 2010 | 4.26 (4.11-4.41) |
| Census Region 3: South | 2011 | 16.76 (16.47-17.04) |
| Census Region 3: South | 2012 | 17.74 (17.44-18.03) |
| Census Region 3: South | 2013 | 1.24 (1.17-1.32) |
| Census Region 3: South | 2014 | 0.78 (0.72-0.83) |
| Census Region 3: South | 2015 | 0.87 (0.81-0.93) |
| Census Region 3: South | 2016 | 1 (0.94-1.07) |
| Census Region 3: South | 2017 | 1.2 (1.13-1.27) |
| Census Region 3: South | 2018 | 1.42 (1.34-1.5) |
| Census Region 3: South | 2019 | 1.65 (1.57-1.73) |
| Census Region 3: South | 2020 | 2.46 (2.37-2.56) |
| Census Region 3: South | 2021 | 4 (3.8-4.1) |
| Census Region 3: South | 2022 | 0.9 (0.8-1.0) |
| Census Region 3: South | 2023 | 0.9 (0.8-1.0) |
| **Total** |  | 4.50 (4.35–4.64) |
| Census Region 4: West | 2000 | 4.54 (4.32-4.77) |
| Census Region 4: West | 2001 | 5.08 (4.85-5.31) |
| Census Region 4: West | 2002 | 5.45 (5.21-5.68) |
| Census Region 4: West | 2003 | 5.87 (5.63-6.11) |
| Census Region 4: West | 2004 | 6.18 (5.93-6.43) |
| Census Region 4: West | 2005 | 6.43 (6.18-6.68) |
| Census Region 4: West | 2006 | 5.91 (5.67-6.15) |
| Census Region 4: West | 2007 | 5.67 (5.44-5.89) |
| Census Region 4: West | 2008 | 5.69 (5.46-5.91) |
| Census Region 4: West | 2009 | 4.81 (4.61-5.02) |
| Census Region 4: West | 2010 | 4.73 (4.53-4.93) |
| Census Region 4: West | 2011 | 19.81 (19.41-20.22) |
| Census Region 4: West | 2012 | 21.15 (20.74-21.56) |
| Census Region 4: West | 2013 | 1.42 (1.31-1.53) |
| Census Region 4: West | 2014 | 0.88 (0.8-0.97) |
| Census Region 4: West | 2015 | 0.93 (0.85-1.02) |
| Census Region 4: West | 2016 | 1.03 (0.95-1.12) |
| Census Region 4: West | 2017 | 1.25 (1.16-1.35) |
| Census Region 4: West | 2018 | 1.28 (1.18-1.37) |
| Census Region 4: West | 2019 | 1.5 (1.39-1.6) |
| Census Region 4: West | 2020 | 1.87 (1.76-1.98) |
| Census Region 4: West | 2021 | 2.3 (2.2-2.4) |
| Census Region 4: West | 2022 | 0.7 (0.7-0.8) |
| Census Region 4: West | 2023 | 0.7 (0.7-0.8) |
| **Total** |  | 4.80 (4.62–4.98) |

**Supplementary Table 8.** CKD and HTN**-**Related mortality AAMRper 100,000 stratified by census region in the United States from 2000 to 2023.

| **Interval of years** | **APC(95% CI)** |
| --- | --- |
| **Overall** |  |
| 2000–2009 | 0.56 (-4.37–5.74) |
| 2009–2012 | 50.45 (-7.83–145.58) |
| 2012–2015 | -68.96 (-90.24–-1.31) |
| 2015–2023 | 29.52 (14.86–46.06) |
| **Male** |  |
| 2000–2009 | 0.38 (-2.77–3.62) |
| 2009–2012 | 51.00 (14.47–99.18) |
| 2012–2015 | -69.00 (-84.41–-38.37) |
| 2015–2023 | 30.34 (18.58–43.27) |
| **Female** |  |
| 2000–2009 | -0.44 (-6.15–5.62) |
| 2009–2012 | 54.42 (-7.08–156.62) |
| 2012–2015 | -68.03 (-91.35–18.20) |
| 2015–2023 | 26.71 (11.16–44.44) |
| **Asian or Pacific Islander** |  |
| 2000–2009 | -1.53 (-6.60–38.17) |
| 2009–2012 | 56.79 (1.94–141.15) |
| 2012–2015 | -73.36 (-90.48–-25.47) |
| 2015–2023 | 26.04 (11.77–42.14) |
| **Black or African American** |  |
| 2000–2009 | -2.75 (-7.73–24.93) |
| 2009–2012 | 58.60 (-3.91–161.78) |
| 2012–2015 | -69.37 (-90.50–-1.21) |
| 2015–2023 | 18.70 (3.78–35.77) |
| **White** |  |
| 2000–2009 | 1.20 (-4.05–6.72) |
| 2009–2012 | 46.77 (-10.64–141.06) |
| 2012–2015 | -67.74 (-90.33–7.69) |
| 2015–2023 | 29.85 (14.95–46.68) |
| **Hispanic or Latino** |  |
| 2000–2009 | -1.45 (-7.20–4.67) |
| 2009–2012 | 63.05 (-0.70–167.71) |
| 2012–2015 | -70.24 (-90.68–4.94) |
| 2015–2023 | 26.63 (12.03–43.14) |
| **Metropolitan** |  |
| 2000–2009 | -0.14 (-2.58–2.35) |
| 2009–2012 | 56.70 (23.24–99.25) |
| 2012–2015 | -72.12 (-85.87–-45.01) |
| 2015–2020 | 36.71 (22.40–52.70) |
| **Non-Metropolitan** |  |
| 2000–2009 | 1.77 (-0.73–4.33) |
| 2009–2012 | 42.70 (15.85–75.78) |
| 2012–2015 | -68.23 (-83.26–-39.71) |
| 2015–2020 | 36.03 (23.00–50.45) |
| **Northeast** |  |
| 2000–2009 | -0.55 (-3.29–2.27) |
| 2009–2012 | 55.34 (19.89–101.28) |
| 2012–2015 | -69.00 (84.23–-39.06) |
| 2015–2023 | 26.20 (15.44–37.97) |
| **Midwest** |  |
| 2000–2009 | 0.92 (-2.56–4.52) |
| 2009–2012 | 45.74 (5.97–100.43) |
| 2012–2015 | -68.11 (-86.95–-22.08) |
| 2015–2023 | 30.50 (17.58–44.84) |
| **South** |  |
| 2000–2009 | -0.61 (-44.41–3.38) |
| 2009–2012 | 53.74 (7.17–120.54) |
| 2012–2015 | -69.37 (-87.18–-26.83) |
| 2015–2023 | 35.23 (21.36–50.68) |
| **West** |  |
| 2000–2009 | 0.69 (-2.15–3.62) |
| 2009–2012 | 57.08 (24.06–98.88) |
| 2012–2015 | -70.41 (-83.33–47.49) |
| 2015–2023 | 25.76 (15.19–37.30) |
| **Young Adults*** |  |
| 2000–2008 | -5.69 (-15.84–5.67) |
| 2008–2012 | 61.25 (16.90–122.42) |
| 2012–2015 | -67.13 (-97.21–287.59) |
| 2015–2023 | 23.87 (1.23–51.58) |
| **Middle Aged Adults*** |  |
| 2000–2009 | -1.86 (-6.44–2.93) |
| 2009–2012 | 70.48 (6.25–173.55) |
| 2012–2015 | -74.31 (-87.76–-46.09) |
| 2015–2023 | 38.18 (22.68–55.63) |
| **Old Adults*** |  |
| 2000–2009 | 0.57 (-5.05–6.52) |
| 2009–2012 | 49.55 (-9.79–147.91) |
| 2012–2015 | -66.41 (-91.13–27.24) |
| 2015–2023 | 19.45 (3.78–37.49) |

**Supplementary Table 9**. Summary APCs of per 100,000 in the United States from 2000 to 2023. (* - Crude Rate was used in place of Age-Adjusted Mortality Rate)
