# Supplementary figures and images for: Trends and Disparities in Chronic Kidney Disease and Hypertension-Related Mortality in the United States, 2000–2023
Source: Research Square preprint supplement (doi:10.21203/rs.3.rs-8880840/v1), 2026-02-21

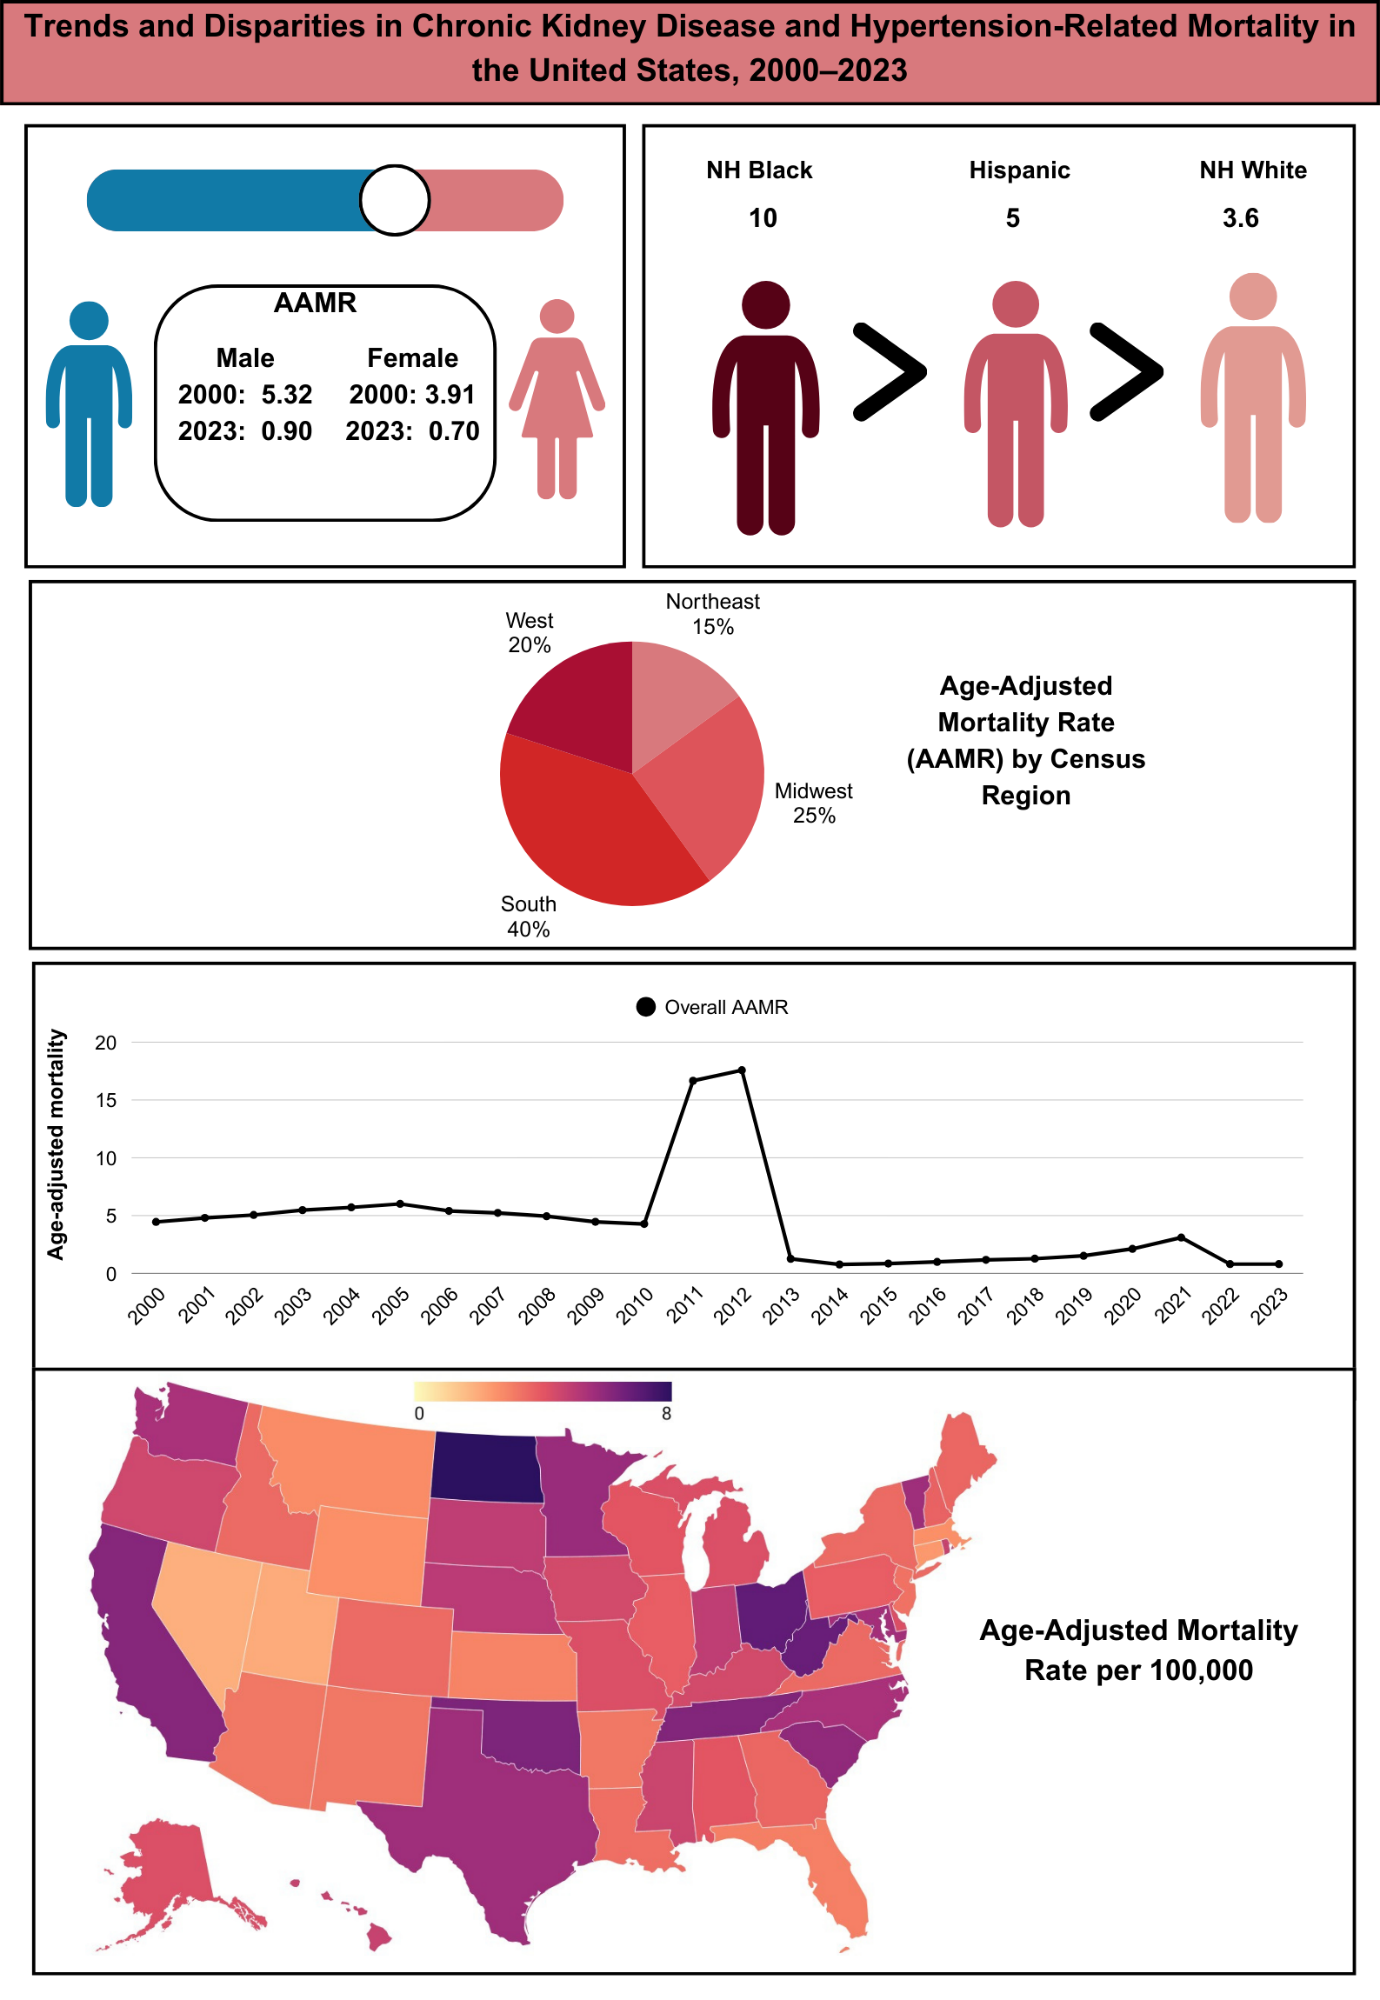


Central illustration

Supplement: Supplementary file 1 [file 18a07513173dfd8126c9edf5.docx]
